# Supplementary material for: Defect-related luminescence behavior of a Mn4+ non-equivalently doped fluoroantimonate red phosphor
Source: Royal Society of Chemistry journal article supplement (doi:10.1039/d1dt03469c), 2021-11-30
Supplement: d1dt03469c1.pdf [file d1dt03469c1.pdf]

## Supporting Information

### **Defect-related luminescence behavior of a Mn<sup>4+</sup> non-equivalently doped fluoroantimonate red phosphor**

Tingting Deng <sup>a, \*</sup>, Shuai Zhang <sup>b</sup>, Rongfu Zhou <sup>a</sup>, Ting Yu <sup>c</sup>, Ming Wu <sup>d</sup>, Xueliang Zhang <sup>a</sup>, Konglan Chen <sup>a</sup>, Yayun Zhou <sup>b, \*</sup>

<sup>a</sup> *Guangdong-Hong Kong-Macao Joint Laboratory for Intelligent Micro-Nano Optoelectronic Technology, School of Physics and Optoelectronic Engineering, Foshan University, Foshan 528225, China*

<sup>b</sup> *State Key Laboratory of Luminescent Materials and Devices, and Guangdong Provincial Key Laboratory of Fiber Laser Materials and Applied Techniques, South China University of Technology, Guangzhou 510641, China*

<sup>c</sup> *School of Applied Physics and Materials, Wuyi University, Jiangmen, Guangdong 529020, China*

<sup>d</sup> *School of Chemical Engineering and Light Industry, Guangdong University of Technology, Guangzhou, 510006, China*

## Figures

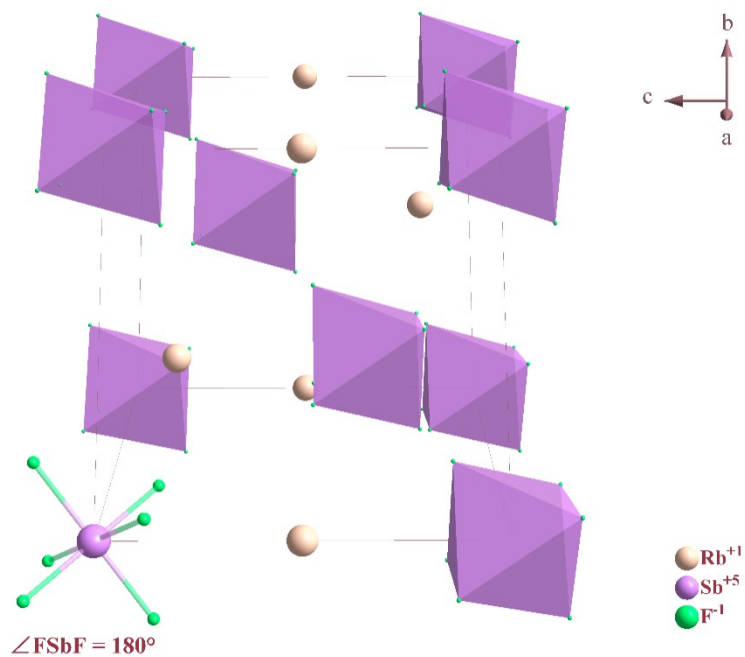

**Fig. S1** The unit cell structure of RbSbF<sub>6</sub>.

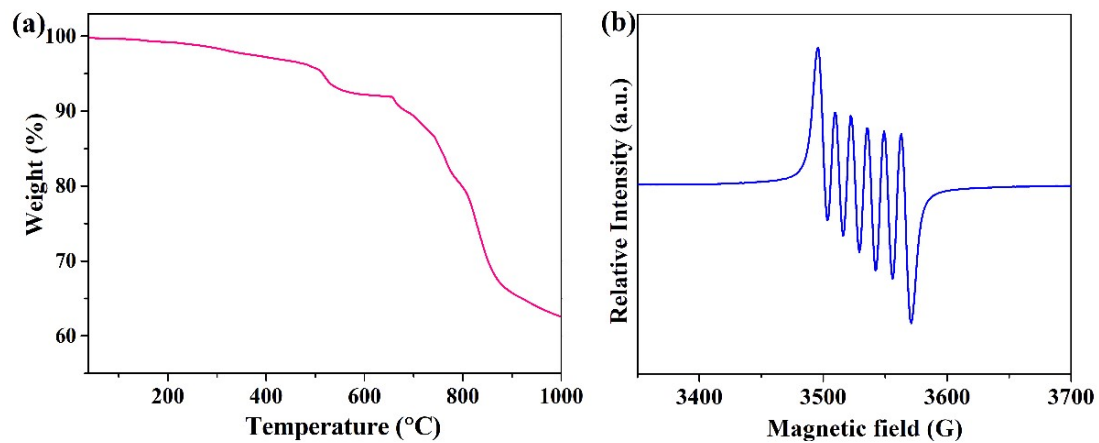

**Fig. S2** (a) The TG thermal analysis of RbSbF<sub>6</sub> matrix. (b) The EPR spectrum of phosphor RbSbF<sub>6</sub>:Mn<sup>4+</sup>.

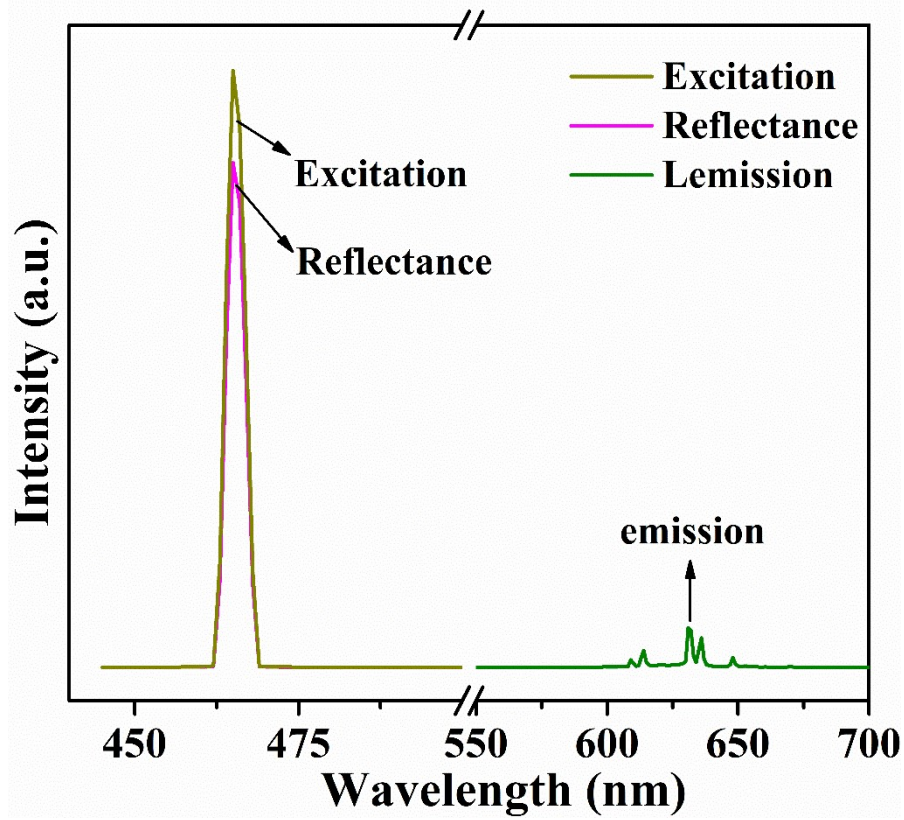

Fig. S3 Excitation of BaSO<sub>4</sub> and reflection, emission spectra of RbSbF<sub>6</sub>:Mn<sup>4+</sup> (0.11 %).

The absorption efficiency (AE), IQE, and EQE were calculated definitely by the following equations: <sup>1</sup>

$$AE = \frac{\int \lambda \{E(\lambda) - R(\lambda)\} d\lambda}{\int \lambda \cdot E(\lambda) d\lambda}$$

$$(1) \quad IQE = \frac{\int \lambda \cdot P(\lambda) d\lambda}{\int \lambda \{E(\lambda) - R(\lambda)\} d\lambda}$$

$$(2) \quad EQE = IQE \times AE = \frac{\int \lambda \cdot P(\lambda) d\lambda}{\int \lambda \cdot E(\lambda) d\lambda}$$

where  $E(\lambda)/h\nu$ ,  $R(\lambda)/h\nu$ , and  $P(\lambda)/h\nu$  are the number of photons in the spectra of excitation, reflectance, and emission of phosphor, respectively.

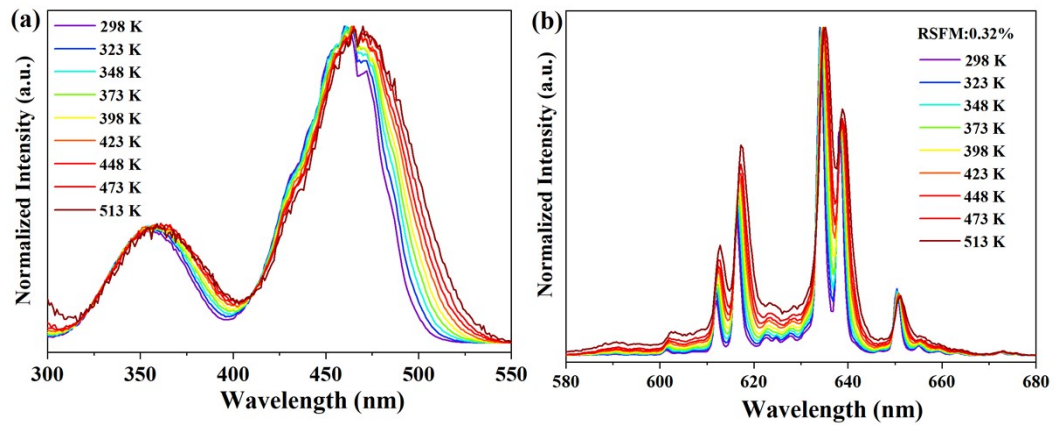

**Fig. S4** The normalized (a) PLE and (b) PL of phosphor  $\text{RbSbF}_6:0.11\%\text{Mn}^{4+}$  as a function of temperature.

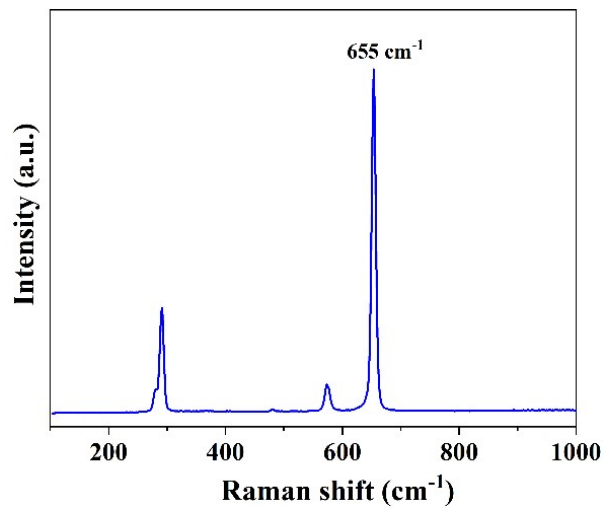

**Fig. S5** The Raman spectrum of  $\text{RbSbF}_6$ .

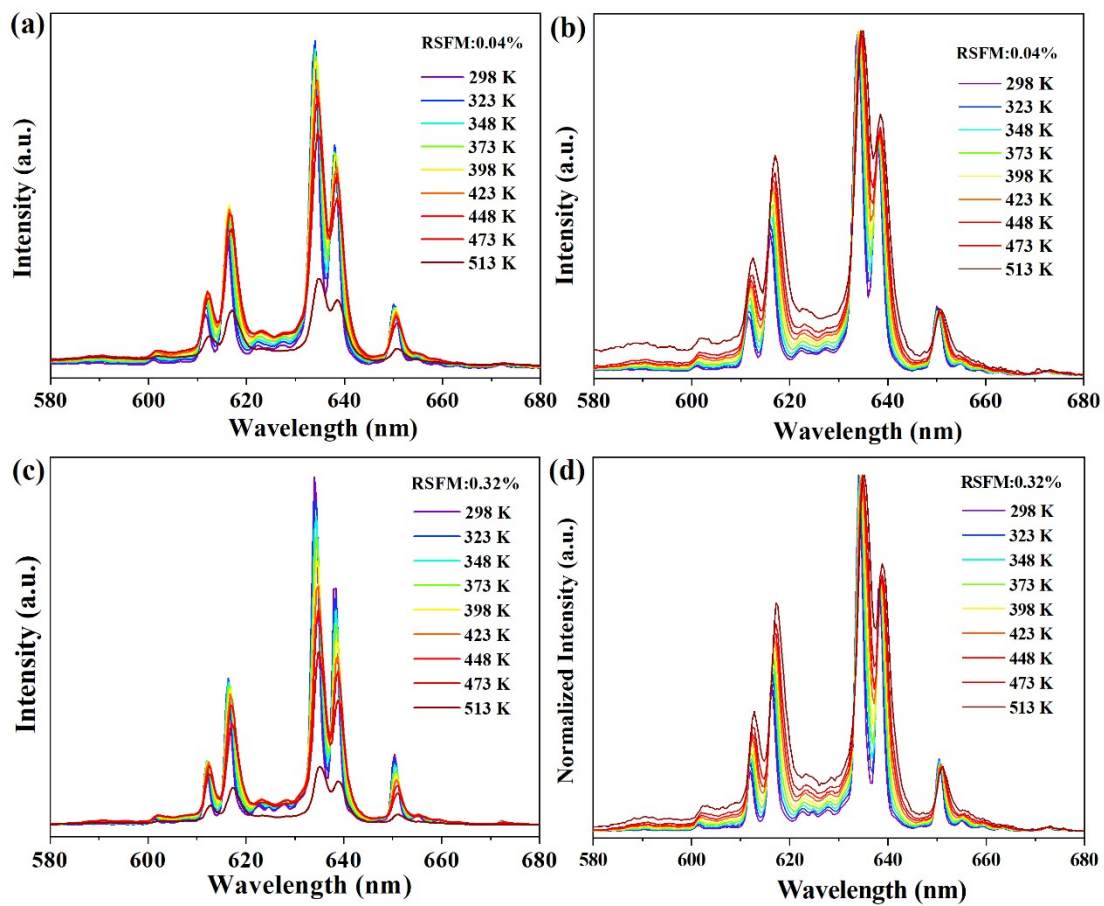

**Fig. S6** The temperature-dependent PL and normalized PL of (a, b) RSbFM:0.04% and (c, d) RSbFM:0.32%.

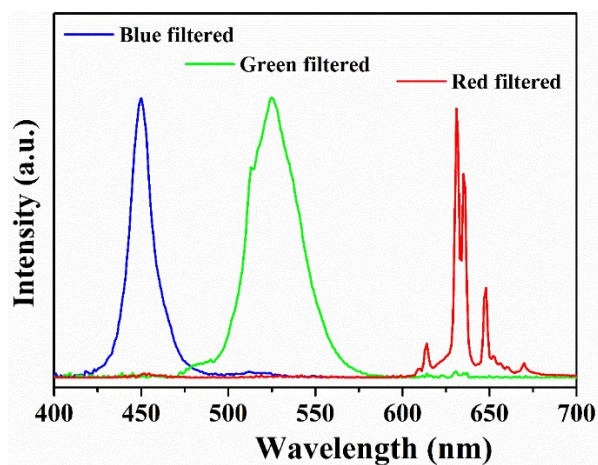

**Fig. S7** The emission spectra through commercial blue, green, and red color filters of fabricated WLED using commercial green  $\beta$ -Sialon:Eu<sup>2+</sup>, blue chip InGaN and RbSbF<sub>6</sub>:Mn<sup>4+</sup>.

## Tables:

**Table S1.** ICP results of Mn concentration of RbSbF<sub>6</sub>:Mn<sup>4+</sup> phosphors.

| Theoretical concentration (mol %)                    | Effective concentration (mol %)      |
|------------------------------------------------------|--------------------------------------|
| K <sub>2</sub> MnF <sub>6</sub> : RbSbF <sub>6</sub> | RbSbF <sub>6</sub> :Mn <sup>4+</sup> |
| 0.5                                                  | 0.04                                 |
| 1.0                                                  | 0.11                                 |
| 2.0                                                  | 0.32                                 |
| 5.0                                                  | 1.29                                 |
| 8.0                                                  | 4.07                                 |
| 10.0                                                 | 5.12                                 |

**Table S2.** The lifetime of samples RbSbF<sub>6</sub>:Mn<sup>4+</sup> fitted by single or double exponential function.

| Sample<br>(x<br>mol%) | Time counts (ms)          |                               | Relative amplitude     |                            | Average<br>lifetime<br>(ms) | R <sup>2</sup> | Residuals                                                                             |
|-----------------------|---------------------------|-------------------------------|------------------------|----------------------------|-----------------------------|----------------|---------------------------------------------------------------------------------------|
|                       | $\tau_{\text{radiative}}$ | $\tau_{\text{non-radiative}}$ | $A_{\text{radiative}}$ | $A_{\text{non-radiative}}$ |                             |                |                                                                                       |
| 0.04                  | 5.7771                    | --                            | --                     | --                         | 5.78                        | 0.9994         | 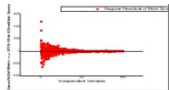 |
| 0.11                  | 5.6468                    | --                            | --                     | --                         | 5.65                        | 0.9991         |  |
| 0.32                  | 5.5726                    | 0.2907                        | 6053.4497              | 1409.3898                  | 5.51                        | 0.9995         |  |
| 1.29                  | 5.1339                    | 0.3729                        | 4203.8727              | 2737.0537                  | 4.92                        | 0.9989         |  |
| 4.07                  | 4.9644                    | 0.2763                        | 845.5088               | 3713.8693                  | 4.04                        | 0.9968         |  |
| 5.12                  | 4.7667                    | 0.2362                        | 435.1032               | 4603.0734                  | 3.21                        | 0.9959         |  |

The double exponential function is expressed as follows:

$$I(t) = A_1 \exp(-t/\tau_1) + A_2 \exp(-t/\tau_2) \quad (1)$$

where  $I$  is the luminescence intensity,  $\tau_1$  and  $\tau_2$  are lifetime components of Mn<sup>4+</sup> emission,  $A_1$  and  $A_2$  are the weight of these two-lifetime components. The lifetime of Mn<sup>4+</sup> can be calculated by:

$$\tau = \frac{A_1 \tau_1^2 + A_2 \tau_2^2}{A_1 \tau_1 + A_2 \tau_2} \quad (2).$$

**Table R3** The lifetime of some Mn<sup>4+</sup> non-equivalently or non-octahedrally doped fluorides.

| Phosphor                                           | Doping concentration | Lifetime (ms) | Ref.      |
|----------------------------------------------------|----------------------|---------------|-----------|
| Na <sub>3</sub> AlF <sub>6</sub> :Mn <sup>4+</sup> | 0.6%                 | 5.91          | 2         |
| Na <sub>3</sub> GaF <sub>6</sub> :Mn <sup>4+</sup> | 0.3%                 | 4.97          | 3         |
| KTeF <sub>5</sub> :Mn <sup>4+</sup>                | 0.13%                | 5.41          | 4         |
| K <sub>3</sub> ZrF <sub>7</sub> :Mn <sup>4+</sup>  | 1.73%                | 4.45          | 5         |
| RbSbF <sub>6</sub> :Mn <sup>4+</sup>               | 0.11%                | 5.65          | this work |

**Table S4.** Photoelectric parameters of W-LEDs fabricated with blue chips InGaN, commercial green phosphor β-Sialon:Eu<sup>2+</sup>, and various fluoride red phosphors.

| Phosphor                                                           | CCT (K) | Efficacy (lm/W) | Chromaticity coordinates (x, y) | NTSC (%) | Ref.      |
|--------------------------------------------------------------------|---------|-----------------|---------------------------------|----------|-----------|
| K <sub>2</sub> SiF <sub>6</sub> :Mn <sup>4+</sup>                  | 8000    | 94              | --                              | 85.9     | 1         |
| K <sub>3</sub> SiF <sub>7</sub> :Mn <sup>4+</sup>                  | 5686    | --              | (0.343, 0.341)                  | 81       | 6         |
| K <sub>2</sub> GeF <sub>6</sub> :Mn <sup>4+</sup>                  | 5013    | 103.12          | --                              | 120.1    | 7         |
| Cs <sub>2</sub> SiF <sub>6</sub> :Mn <sup>4+</sup>                 | 6880    | 133             | (0.302, 0.349)                  | 84.7     | 8         |
| Cs <sub>2</sub> MnF <sub>6</sub> :Si <sup>4+</sup>                 | 7856    | 26.0            | (0.2976, 0.3032)                | 122.3    | 9         |
| K <sub>2</sub> NaScF <sub>6</sub> :Mn <sup>4+</sup>                | 5986    | 67.65           | (0.3219, 0.3356)                | 127.3    | 10        |
| K <sub>2</sub> NaScF <sub>6</sub> :Mn <sup>4+</sup>                | 8841    | 73.7            | (0.2883, 0.2996)                | 105.6    | 11        |
| Rb <sub>2</sub> NaScF <sub>6</sub> :Mn <sup>4+</sup>               | 8458    | 80.7            | (0.2891, 0.3056)                | 108.4    | 11        |
| Cs <sub>2</sub> NaScF <sub>6</sub> :Mn <sup>4+</sup>               | 8470    | 77.0            | (0.2852, 0.3159)                | 105.6    | 11        |
| Cs <sub>2</sub> KGaF <sub>6</sub> :Mn <sup>4+</sup>                | --      | 106.30          | (0.2811, 0.3107)                | 114.6    | 12        |
| (NH <sub>4</sub> ) <sub>3</sub> SiF <sub>7</sub> :Mn <sup>4+</sup> | 6844    | 39.3            | (0.3099, 0.3112)                | 122.8    | 13        |
| K <sub>2</sub> NbF <sub>7</sub> :Mn <sup>4+</sup>                  | 4775    | 78.14           | (0.3506, 0.3476)                | 86.7     | 14        |
| KNaMo <sub>2</sub> F <sub>4</sub> :Mn <sup>4+</sup>                | 4476    | 81.43           | (0.3374, 0.335)                 | 105      | 15        |
| K <sub>3</sub> HF <sub>2</sub> NbOF <sub>5</sub> :Mn <sup>4+</sup> | 6688    | 95.78           | (0.3126, 0.3093)                | 108.6    | 16        |
| RbSbF <sub>6</sub> :Mn <sup>4+</sup>                               | 10742   | 103.7           | (0.2991, 0.3020)                | 121.7    | this work |

**Equation**

The formation energy of RbSbF<sub>6</sub>:Mn<sup>4+</sup> with one Mn atom substitution on one Sb site of the 2 × 2 × 2 supercell was calculated by DFT using the following equation:

$$E_f = E(\text{doped}) - E(\text{pure}) - \mu_{\text{Sb}} + \mu_{\text{Mn}}$$

where E(doped) and E(pure) are the total energies of Sb<sup>3+</sup> doped system and perfect system, and the  $\mu_{\text{Sb}}$  and  $\mu_{\text{Mn}}$  are denoted as the chemical potentials of Sb and Mn atoms, respectively. For the metal cations, the chemical potentials were obtained from the calculations of the respective bulk materials. For the F atom, its chemical potential was gained from the calculation of F<sub>2</sub> molecule.

**Reference**

1. L. Wang, X. Wang, T. Kohsei, K. I. Yoshimura, M. Izumi, N. Hiroaki, R. J. Xie, *Optic*

*Express*, 2015, 23, 28707-28717.

2. E. H. Song, J. Q. Wang, S. Ye, X. F. Jiang, M. Y. Peng and Q. Y. Zhang, *J. Mater. Chem. C*, 2016, 4, 2480-2487.
3. T. T. Deng, E. H. Song, J. Sun, L. Y. Wang, Y. Deng, S. Ye, J. Wang and Q. Y. Zhang, *J. Mater. Chem. C*, 2017, 5, 2910-2918.
4. T. T. Deng, E. H. Song, J. Su, Y. Y. Zhou, L. Y. Wang, S. Ye and Q. Y. Zhang, *J. Mater. Chem. C*, 2018, 6, 4418 -4426.
5. H. Y. Tan, M. Z. Rong, Y. Y. Zhou, Z. Y. Yang, Z. L. Wang, Q. H. Zhang, Q. Wang and Q. Zhou, *Dalton Transactions*, 2016, 45, 9654-9660.
6. M. Noh, D.H. Yoon, C. H. Kim, S. J. Lee, *J. Mater. Chem. C*, 2019, 7, 15014-15020.
7. H. J. Yu, B. C. Wang, X. Y. Bu, Y. G. Liu, J. Chen, Z. H. Huang, M. H. Fang, *Ceram. Int.*, 2020, 46, 18281-18286.
8. Y. Liu, Z. Zhou, L. Huang, M. G. Brik, S. Si, L. Lin, T. Xuan, H. Liang, J. Qiu, J. Wang, *J. Mater. Chem. C*, 2019, 7, 2401-2407.
9. J. Zhang, L. Liu, S. He, J. Peng, F. Du, F. Yang, X. Ye, *Inorg. Chem.*, 2019, 58, 15207-15215.
10. H. Ming, L. Liu, S. He, J. Peng, F. Du, J. Fu, F. Yang, X. Ye, *J. Mater. Chem. C*, 2019, 7, 7237-7248.
11. Y. Y. Zhou, E. H. Song, M. G. Brik, Y. J. Wang, T. Hu, Z. G. Xia, Q. Y. Zhang, *J. Mater. Chem. C*, 2019, 7, 9203-9210.
12. J. Li, Y. J. Wang, H. F. Zhe, Y. Y. Zhou, Q. Zhou, Z. L. Wang, *J. Alloys Compd.*, 2021, 881, 160624.
13. T. T. Deng, E. H. Song, Y. Y. Zhou, J. Y. Chen, W. L. Liu, H. W. Deng, X. Q. Zheng, H. Y. Huang, *J. Alloys Compd.*, 2020, 847, 156550.
14. H. Lin, T. Hu, Q. Huang, Y. Cheng, B. Wang, J. Xu, J. Wang, Y. Wang, *Laser Photon. Rev.*, 2017, 11, 1700148.
15. J. Wu, B. Wang, Z. Y. Liu, K. Zhang, X. S. Li, J. H. Huang, P. F. Liu, Q. G. Zeng, *Dalton Trans.*, 2021, 50, 11189-11196.
16. L. Q. Yao, S. G. He, W. D. Nie, L. Fu, Z. J. Liao, W. T. Cai, R. X. Wang, J. Q. Peng, X. Y. Ye, *J. Lumin.*, 2021, 238, 118315.
